# Supplementary material for: Ultrasensitive Optical Detection of Water Pressure in Microfluidics Using Smart Reduced Graphene Oxide Glass
Source: PubMed Central journal article supplement (PMC6555094; doi:10.3389/fchem.2019.00395), 2019-05-31
Supplement: Presentation_1.pdf [file Presentation_1.pdf]

# Ultrasensitive optical detection of water pressure in microfluidics using smart reduced graphene oxide glass

Wei Xin<sup>1#</sup>, Tiange Wu<sup>2#</sup>, Tingting Zou<sup>1</sup>, Ye Wang<sup>1</sup>, Wenshuai Jiang<sup>3</sup>, Fei Xing<sup>2\*</sup>, JianJun Yang<sup>1</sup>, Chunlei Guo<sup>1,4\*</sup>

# These authors contributed equally to this work

<sup>1</sup>The Guo China-US Photonics Laboratory, State Key Laboratory of Applied Optics, Changchun Institute of Optics, Fine Mechanics and Physics, Chinese Academy of Sciences, Changchun, China

<sup>2</sup>School of Physics and Optoelectronic Engineering, Shandong University of Technology, Zibo, China

<sup>3</sup>School of Biomedical Engineering, Xinxiang Medical University, Xinxiang, China

<sup>4</sup>The Institute of Optics, University of Rochester, Rochester, New York, USA

**\* Correspondence:**

Fei Xing

xingfei@sdut.edu.cn;

Chunlei Guo

guo@optics.rochester.edu

## Supplementary Material

### S1. Universal applicability of optical detection to laser wavelength

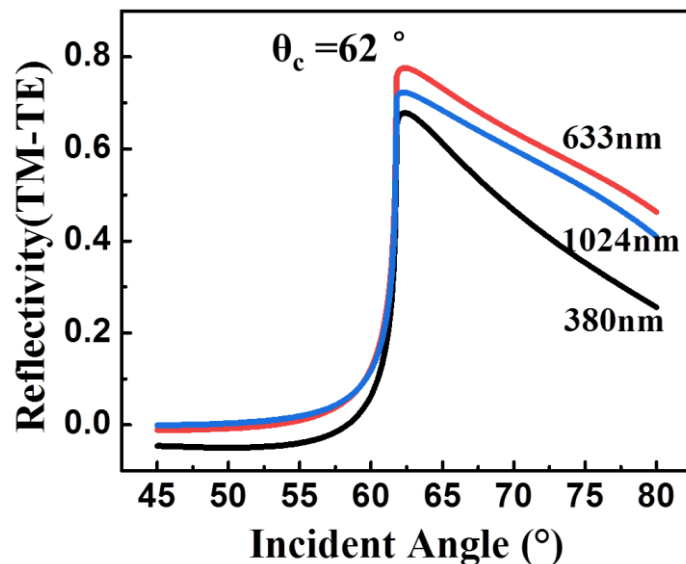

Figure 1. The simulation of reflection difference between TM and TE modes (TM-TE) of rGO under the irradiation of different wavelength lasers

### S2. Universal applicability of optical detection to different liquids

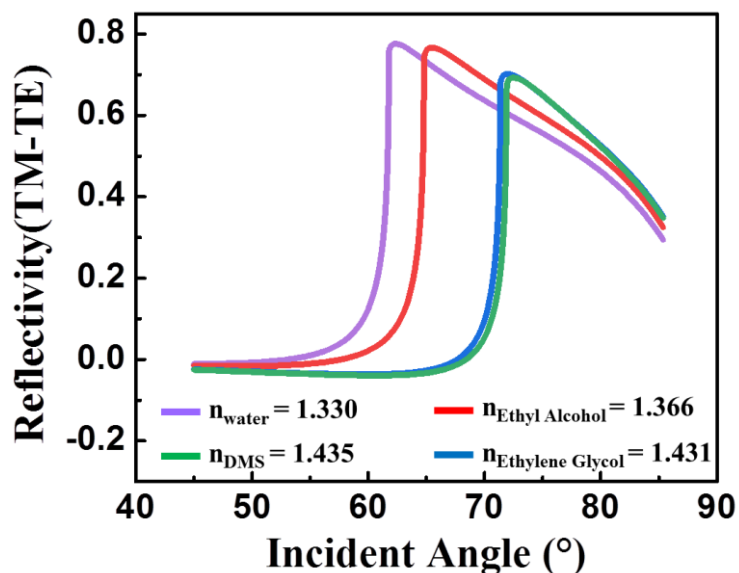

Figure 2. The simulation of reflection difference between TM and TE modes (TM-TE) of rGO with different medium ( $n_2$ )
